# Supplementary material for: Explaining the spread in measurement of PDMS elastic properties: influence of test method and curing protocol
Source: Royal Society of Chemistry journal article supplement (doi:10.1039/d4sm00573b), 2024-01-01
Supplement: d4sm00573b1.pdf [file d4sm00573b1.pdf]

# Electronic Supplementary Information for *Explaining the spread in measurement of PDMS elastic properties: influence of test method and curing protocol*

Hannah Varner,<sup>a</sup> and Tal Cohen<sup>a,b,\*</sup>

## 1 Connectedness of existing literature

Litmaps software was used to create a connectedness diagram of all the studies used in this review shown in Figure ESI.F1. Lötters<sup>1</sup> is seen to be particularly commonly cited with work on PDMS.

 Litmaps

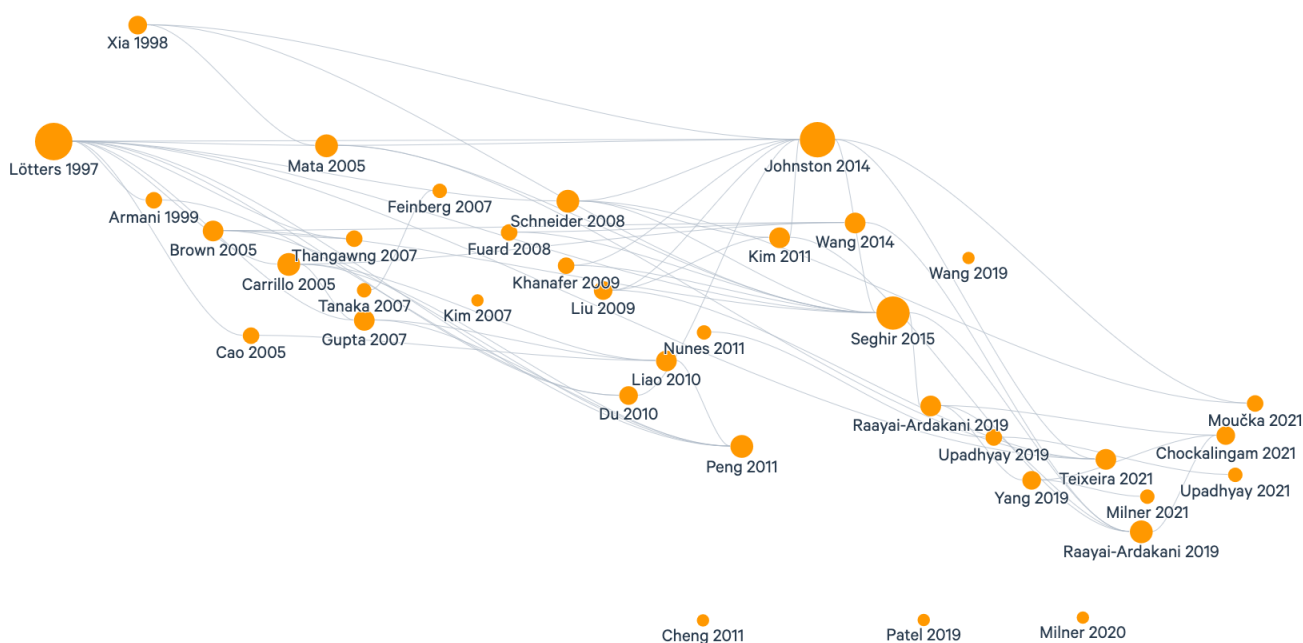

Fig. ESI.F1 Included studies show citation links between articles. Markers are sized based on relevance within the network and sorted chronologically from left to right, and vertically on a log scale by total citations in any field per the Litmaps Database<sup>2</sup>

<sup>a</sup> Department of Mechanical Engineering, Massachusetts Institute of Technology, Cambridge, MA.

<sup>b</sup> Department of Civil and Environmental Engineering, Massachusetts Institute of Technology, Cambridge, MA.

\* Corresponding author. E-mail: talco@mit.edu. 77 Massachusetts Avenue, Cambridge, MA 02139.

## 2 Additional data

Previously unpublished data included in this paper was collected with the method described by Chockalingam et al.<sup>3</sup> via cyclic loading between a radius of  $a = 0.06$  mm and 0.08 mm with 400 seconds of relaxation. A neo-Hookean material model is considered and a non-linear least squares fitting is used to determine an initial defect size  $A$  (used to calculate a stretch  $\lambda$ ) and shear modulus  $\mu$ .

All samples are SYLGARD 184 mixed via a THINKY planetary mixer and cured at 100 °C for 2 hours. Sample identifiers indicate the composition used as  $S[w_{B+oil}]-[(w_{oil}/w_{B+oil})100]$  e.g. S40-10 is a 40:1 base to curing agent ratio with 10% non-reactive PDMS oil ( $\mu$ MicroLuburool, 350cSt). Reported shear modulus in Table ESI.T1 is the mean  $\bar{\mu}$  of results collected for each rate of  $\dot{a} = 0.01, 0.02, 0.04, 0.08, 0.16, \text{ and } 0.32$  [mm/s] with a standard deviation calculated from all six rates for all trials,  $N$ , within a sample.

Table ESI.T1 Additional data presented in this work with associated composition and fit parameters for shear modulus and initial defect size

| Sample ID | $w_{B+oil}:w_{oil}:w_C$ | $N_{trials}$ | $\bar{\mu} \pm \sigma$ [kPa] | $A \pm \sigma$ [mm] |
|-----------|-------------------------|--------------|------------------------------|---------------------|
| S55-10    | 50+5.6:1                | 2            | $3.65 \pm 0.11$              | $0.326 \pm 0.01$    |
| S50-00a   | 50+0:1                  | 4            | $5.71 \pm 0.16$              | $0.319 \pm 0.01$    |
| S50-00b   | 50+0:1                  | 3            | $4.71 \pm 0.51$              | $0.321 \pm 0.01$    |
| S50-00c   | 50+0:1                  | 2            | $5.47 \pm 0.29$              | $0.342 \pm 0.007$   |
| S50-10    | 45+5:1                  | 3            | $7.38 \pm 0.37$              | $0.366 \pm 0.02$    |
| S50-20    | 40+10:1                 | 3            | $7.24 \pm 0.34$              | $0.395 \pm 0.006$   |
| S45-00a   | 45+0:1                  | 1            | $11.9 \pm 0.24$              | $0.448 \pm 0.02$    |
| S45-00b   | 45+0:1                  | 4            | $10.6 \pm 0.81$              | $0.414 \pm 0.03$    |
| S40-00    | 40+0:1                  | 4            | $14.4 \pm 1.8$               | $0.460 \pm 0.02$    |

## 3 Included studies

A summary of all studies included in the manuscript is listed in Table ESI.T2. Curing temperature listed as 25 °C for all room temperatures cures and specified as RT in the Heating Method column. Unspecified methods are abbreviated as UNS throughout.

Table ESI.T2 Summary of all included studies

| Author                            | Test Type                     | Cure Temp [C] | Cure Time [hr:min] | Mix Ratio [base+oil: curing agent] | Heating method | Mixing and degas                       |
|-----------------------------------|-------------------------------|---------------|--------------------|------------------------------------|----------------|----------------------------------------|
| Chockalingam 2021 <sup>3</sup>    | VCCE                          | 100           | 2:00               | variable, Si Oil                   | Oven           | Planetary mixer, vacuum degas 30 min   |
| Raayai-Ardakani 2019 <sup>4</sup> | VCCE                          | 40            | 72:00              | variable                           | Oven           | Planetary mixer, vacuum degas 30 min   |
| Raayai-Ardakani 2019 <sup>5</sup> | VCCE                          | 40            | 72:00              | variable                           | Oven           | Planetary mixer, vacuum degas 30 min   |
| This work                         | VCCE                          | 100           | 2:00               | variable, Si Oil                   | Oven           | Planetary mixer, vacuum degas 30 min   |
| Milner 2021 <sup>6</sup>          | Cavitation Rheology           | 25            | 144:00             |                                    | RT             | Planetary mixer, vacuum degas          |
| Milner 2021 Thesis <sup>7</sup>   | Cavitation Rheology           | 25            | 144:00             | variable                           | RT             | Planetary mixer, vacuum degas          |
| Yang 2019 <sup>8</sup>            | Cavitation Rheology           | 25            | 144:00             | variable, Si Oil                   | RT             | Planetary mixer, vacuum degas          |
| Nunes 2011 <sup>9</sup>           | Simple Shear                  | 25            | 144:00             | 10:1                               | RT             | UNS                                    |
| Upadhyay 2019 <sup>10</sup>       | Simple Shear                  | 60            | 3:00               | 10:1                               | Oven           | UNS mixing, vacuum degas 2 hr          |
| Brown 2005 <sup>11</sup>          | Tension                       | 60            | 20:00              | 10-50:1                            | Oven           | UNS mixing, vacuum degas 30 min        |
| Fuard 2008 <sup>12</sup>          | Tension                       | 100           | 1:30, 2:00         | variable                           | Oven           | UNS                                    |
| Johnston 2014 <sup>13</sup>       | Tension†                      | 25-200        | variable           | 10:1                               | Oven           | Flocculator, degas 30 min              |
| Khanafer 2008 <sup>14</sup>       | Tension                       | 65            | 12:00              | 6-10:1                             | Oven           | UNS mixing, vacuum degas >2 hr         |
| Kim 2011 <sup>15</sup>            | Tension                       |               |                    | 5-15:1                             | UNS            | UNS                                    |
| Liu 2009 <sup>16</sup>            | Tension†                      | 100 or 200    | variable           | 10:1                               | Hot plate      | UNS                                    |
| Mills 2008 <sup>17</sup>          | Tension‡                      | 150           | 12:00              | 10:1                               | UNS            | UNS                                    |
| Moučka 2021 <sup>18</sup>         | Tension†                      | 25-150        | variable           | 10:1, Si Oil                       | UNS            | Vacuum mixer 100 RPM 10 min            |
| Schneider 2008 <sup>19</sup>      | Tension                       | 150           | 0:15               | 10:1                               | Oven           | Hand mix 6 min, degas                  |
| Seghir 2015 <sup>20</sup>         | Tension                       | 10 or 160     | 2:00, 144:00       | variable                           | Hot plate      | UNS with 5 low vacuum cycles           |
| Upadhyay 2021 <sup>21</sup>       | Tension                       | 60            | 3:00               | 10:1                               | Oven           | UNS mixing, vacuum degas 2 hr          |
| Wang 2019 <sup>22</sup>           | Tension                       | 65            | 4:00               | 10-30:1                            | Oven           | Planetary mixer, vacuum degas          |
| Wang 2014 <sup>23</sup>           | Compression                   | 65            | 12:00              | 5-33:1                             | Oven           | UNS mixing, vacuum degas               |
| Carrillo 2005 <sup>24</sup>       | Compression & Nanoindentation | 25            | 336:00             | 10-30:1                            | RT             | UNS mixing 10 min                      |
| Cao 2005 <sup>25</sup>            | Nanoindentation               | 70            | 24:00              | 10:1                               | Hot plate      | UNS                                    |
| Cheng 2011 <sup>26</sup>          | Nanoindentation               | 65            | 1:30               | 10:1                               | Vacuum cure    | UNS mixing 10 min, spin coated, vacuum |
| Gupta 2007 <sup>27</sup>          | Nanoindentation               | 25            | 0:20, 2:40         | variable                           | RT             | UNS                                    |
| Liao 2010 <sup>28</sup>           | Nanoindentation               | 85            | 2:00               | variable                           | UNS            | UNS                                    |
| Mata 2005 <sup>29</sup>           | Nanoindentation               | 95            | 0:30               | 5.7-21:1                           | Oven           | UNS mixing, spin coated                |
| Patel 2019 <sup>30</sup>          | Nanoindentation               | 70            | 5:00               | 10:1                               | UNS            | UNS mixing, vacuum degas 30 min        |
| Peng 2011 <sup>31</sup>           | Nanoindentation               | 60            | 20:00              | 50:1                               | Oven           | UNS mixing, vacuum degas               |
| Armani 1999 <sup>32</sup>         | Beam Bending                  | 90            | 0:15               | 5-15:1                             | UNS            | UNS                                    |
| Du 2010 <sup>33</sup>             | Beam Bending                  | 65            | 1:30               | 10:1                               | Hot plate      | UNS                                    |
| Li 2024 <sup>34</sup>             | Cylindrical Cavity Expansion  | 100           | 2:00               | variable                           | Oven           | Planetary mixer, vacuum degas 30 min   |
| Thangawng 2007 <sup>35</sup>      | Membrane                      | 110           | 0:15               | 10:1                               | Hot plate      | UNS, spin coated                       |

## 4 Distribution of predictor variables

Spearman Correlations were chosen to describe the data for two main reasons: first, we wanted to avoid imposing linearity in the relationship between the predictors (cure time, cure temperature, or mix ratio) and the resulting stiffness. Second, all three predictors are not normally distributed (rejecting the null hypothesis that the data are from a normally distributed population at a confidence level of  $p < 0.05$  for the Kolmogorov-Smirnov test). Ordinal scale plots of the predictor variables are included in Fig. ESI.F2.

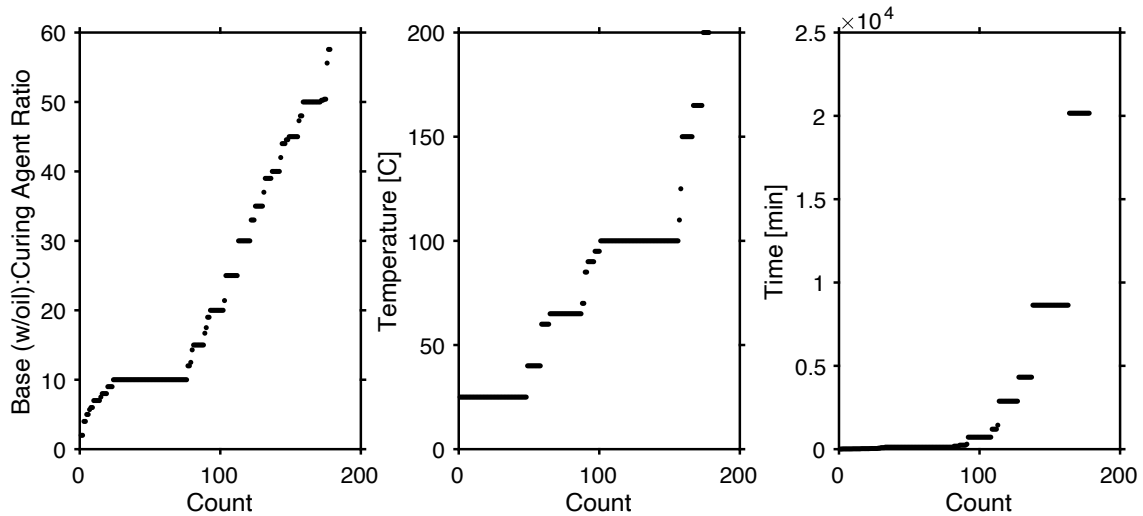

Fig. ESI.F2 Ordinal plot of predictor variables.

## 5 PDMS reaction chemistry

PDMS is formed from a base with bi-vinyl terminated  $-R^2Si-O-$  units combined with a curing agent containing S-H silane groups to form siloxane repeating units  $-Si-O-$  between cross links in the presence of a platinum catalyst<sup>36-38</sup>. The average molecular weight between cross links  $M_c$  is determined by the curing agent ratio, with the higher weight, and therefore longer, chains resulting in softer material. SYLGARD 184 is not pure PDMS, however the reaction pathway remains the same<sup>36,39</sup>. Schweitzer et al.<sup>40</sup> report  $M_c$  increases 3-6 fold between  $w_B:w_C$  of 10:1 and 20:1 with SYLGARD 184 (2400 to 7600 g/mol). Measuring five curing agent ratios between 10:1 and 25:1, the increasing  $M_c$  increases exponentially. This supports the nonlinear relation between  $\mu$  and  $w_B:w_C$  observed in Fig. 2 given<sup>41</sup>  $M_c \propto 1/\mu$ .

## 6 Predictor variable contour plots

To visually examine the inter dependencies of the predictor variables, Fig. ESI.F3 shows the contour plots for the permutations of mix ratio, cure time and cure temperature. Contour plots were generated in MATLAB 2023b using the Curve Fitting Toolbox and linearly interpolated surfaces. Fig. ESI.F3(a) shows how the combined effects of higher cross linker concentration and hotter cure temperature lead to the stiffest material while Fig. ESI.F3(b) and (c) confirm that total cure time does not have a strong effect on shear modulus.

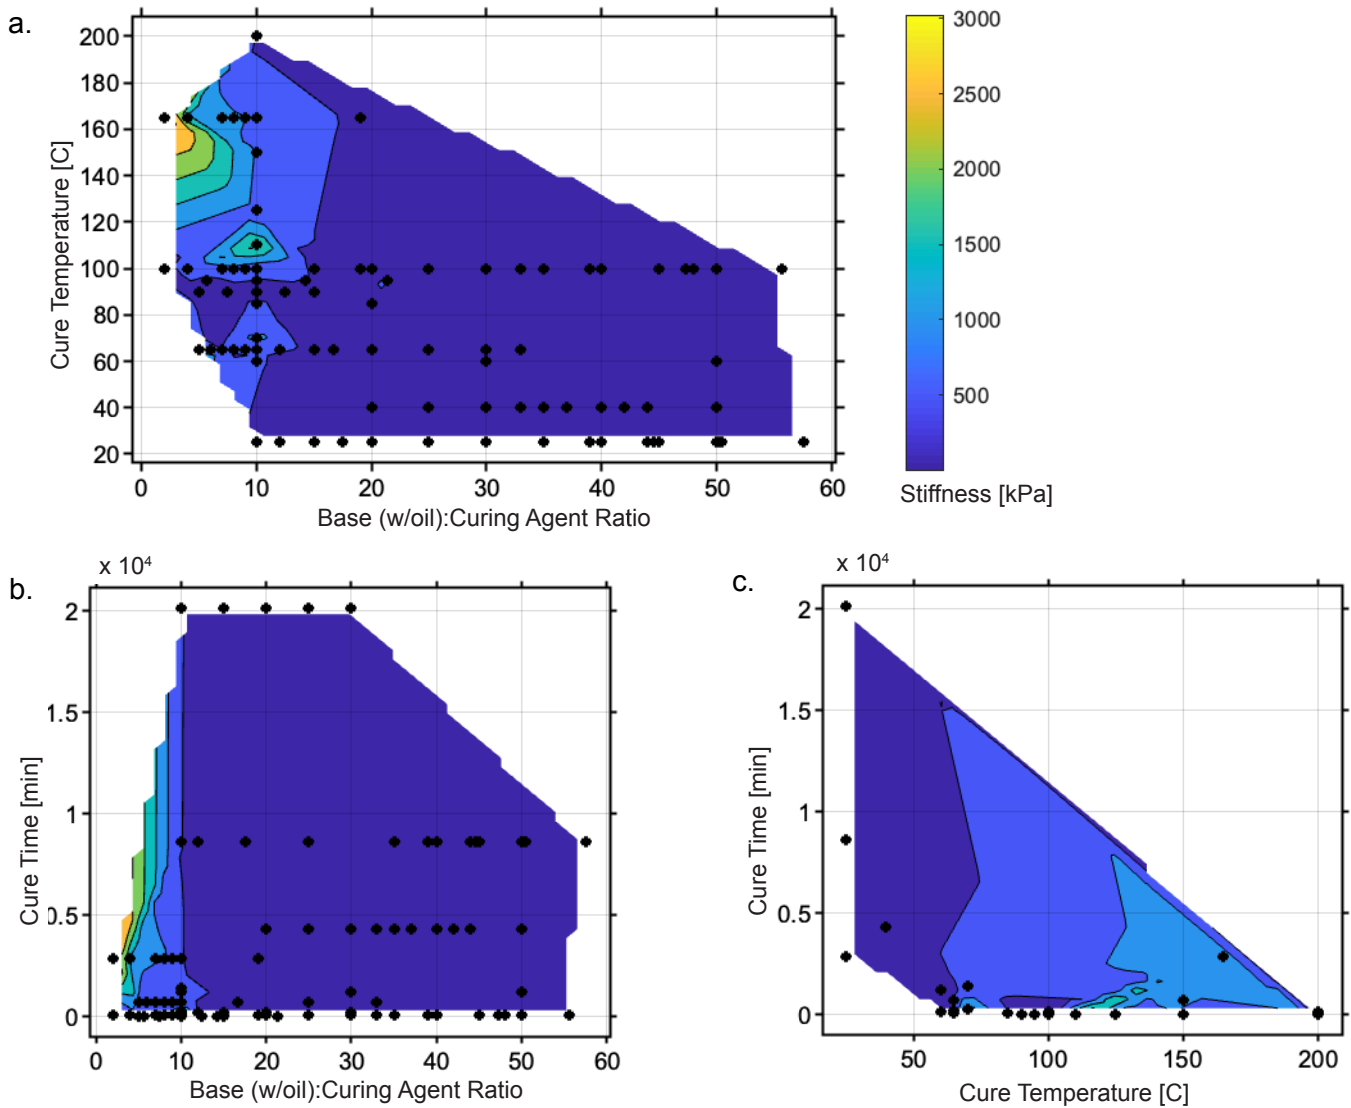

Fig. ESI.F3 Contour plots of the effect of mixing ratio, cure temperature and cure time on shear modulus. The effect of mixing ratio is seen to outweigh the effect of cure time. (a) compares the effect of mixing ratio and cure temperature on shear modulus with all points shown as black circles. Both predictors are seen to have an effect on the resulting stiffness. (b) compares cure time and mixing ratio while (c) compares cure time and temperature with mix ratio and temperature dominating over time, respectively.

## Notes and references

- 1 J. C. Lötters, W. Olthuis, P. H. Veltink and P. Bergveld, *Journal of Micromechanics and Microengineering*, 1997, **7**, 145.
- 2 D. Dixon, *Our Database – FAQ*, 2024, [https://docs.litmaps.com/en/articles/7212085-our-database-faq#h\\_d5f0461dd4](https://docs.litmaps.com/en/articles/7212085-our-database-faq#h_d5f0461dd4).
- 3 S. Chockalingam, C. Roth, T. Henzel and T. Cohen, *Journal of the Mechanics and Physics of Solids*, 2021, **146**, 104172.
- 4 S. Raayai-Ardakani and T. Cohen, *Extreme Mechanics Letters*, 2019, **31**, 100536.
- 5 S. Raayai-Ardakani, Z. Chen, D. R. Earl and T. Cohen, *Soft matter*, 2019, **15**, 381–392.
- 6 M. P. Milner and S. B. Hutchens, *Mechanics of Materials*, 2021, **154**, 103741.
- 7 M. P. Milner, *PhD thesis*, University of Illinois at Urbana-Champaign, 2020.
- 8 S. Yang, D. Bahk, J. Kim, A. Kataruka, A. C. Dunn and S. B. Hutchens, *International Journal of Fracture*, 2019, **219**, 89–99.
- 9 L. Nunes, *Materials Science and Engineering: A*, 2011, **528**, 1799–1804.
- 10 K. Upadhyay, A. Bhattacharyya, G. Subhash and D. Spearot, *Experimental Mechanics*, 2019, **59**, 733–747.
- 11 X. Q. Brown, K. Ookawa and J. Y. Wong, *Biomaterials*, 2005, **26**, 3123–3129.
- 12 D. Fuard, T. Tzvetkova-Chevolleau, S. Decossas, P. Tracqui and P. Schiavone, *Microelectronic Engineering*, 2008, **85**, 1289–1293.
- 13 I. D. Johnston, D. K. McCluskey, C. K. Tan and M. C. Tracey, *Journal of Micromechanics and Microengineering*, 2014, **24**, 035017.
- 14 K. Khanafer, A. Duprey, M. Schlicht and R. Berguer, *Biomedical microdevices*, 2009, **11**, 503–508.
- 15 T. K. Kim, J. K. Kim and O. C. Jeong, *Microelectronic Engineering*, 2011, **88**, 1982–1985.
- 16 M. Liu, J. Sun and Q. Chen, *Sensors and Actuators A: Physical*, 2009, **151**, 42–45.
- 17 K. Mills, X. Zhu, S. Takayama and M. Thouless, *Journal of materials research*, 2008, **23**, 37–48.
- 18 R. Moučka, M. Sedláčik, J. Osička and V. Pata, *Scientific reports*, 2021, **11**, 19090.
- 19 F. Schneider, T. Fellner, J. Wilde and U. Wallrabe, *Journal of Micromechanics and Microengineering*, 2008, **18**, 065008.
- 20 R. Seghir and S. Arscott, *Sensors and Actuators A: Physical*, 2015, **230**, 33–39.
- 21 K. Upadhyay, D. Spearot and G. Subhash, *International Journal of Impact Engineering*, 2021, **156**, 103949.
- 22 Z. Wang, C. Xiang, X. Yao, P. Le Floch, J. Mendez and Z. Suo, *Proceedings of the National Academy of Sciences*, 2019, **116**, 5967–5972.
- 23 Z. Wang, A. A. Volinsky and N. D. Gallant, *Journal of Applied Polymer Science*, 2014, **131**,.
- 24 F. Carrillo, S. Gupta, M. Balooch, S. J. Marshall, G. W. Marshall, L. Pruitt and C. M. Puttlitz, *Journal of materials research*, 2005, **20**, 2820–2830.
- 25 Y. Cao, D. Yang and W. Soboyejoy, *Journal of Materials Research*, 2005, **20**, 2004–2011.
- 26 C. Cheng, *PhD thesis*, The University of Texas at Dallas, 2011.
- 27 S. Gupta, F. Carrillo, C. Li, L. Pruitt and C. Puttlitz, *Materials Letters*, 2007, **61**, 448–451.
- 28 Q. Liao, J. Huang, T. Zhu, C. Xiong and J. Fang, *Mechanics of Materials*, 2010, **42**, 1043–1047.
- 29 A. Mata, A. J. Fleischman and S. Roy, *Biomedical microdevices*, 2005, **7**, 281–293.
- 30 H. Patel, C. Yang, H. Lee and A. A. Pelegri, ASME International Mechanical Engineering Congress and Exposition, 2019, p. V009T11A031.
- 31 X. Peng, J. Huang, H. Deng, C. Xiong and J. Fang, *Measurement Science and Technology*, 2011, **22**, 027003.
- 32 D. Armani, C. Liu and N. Aluru, Technical Digest. IEEE International MEMS 99 Conference. Twelfth IEEE International Conference on Micro Electro Mechanical Systems (Cat. No. 99CH36291), 1999, pp. 222–227.
- 33 P. Du, I.-K. Lin, H. Lu and X. Zhang, *Journal of Micromechanics and Microengineering*, 2010, **20**, 095016.
- 34 J. Li, Z. Xie, H. Varner, S. Chockalingam and T. Cohen, *arXiv:2408.12920 [cond-mat.mtrl-sci]*, 2024.
- 35 A. L. Thangawng, R. S. Ruoff, M. A. Swartz and M. R. Glucksberg, *Biomedical microdevices*, 2007, **9**, 587–595.
- 36 M. P. Wolf, G. B. Salieb-Beugelaar and P. Hunziker, *Progress in Polymer Science*, 2018, **83**, 97–134.
- 37 A. Esteves, J. Brokken-Zijp, J. Laven, H. Huinink, N. Reuvers, M. Van and G. De With, *Polymer*, 2009, **50**, 3955–3966.
- 38 V. Heinrichs, S. Dieluweit, J. Stellbrink, W. Pyckhout-Hintzen, N. Hersch, D. Richter and R. Merkel, *PLoS One*, 2018, **13**, e0195180.
- 39 R. N. Palchesko, L. Zhang, Y. Sun and A. W. Feinberg, *PloS one*, 2012, **7**, e51499.
- 40 J. Schweitzer, S. Merad, G. Schrodj, F. Bally-Le Gall and L. Vonna, *Journal of Chemical Education*, 2019, **96**, 1472–1478.
- 41 Y.-H. Zang, R. Muller and D. Froelich, *Polymer*, 1989, **30**, 2060–2062.
